# Supplementary material for: First enantioselective iron-porphyrin-catalyzed sulfide oxidation with aqueous hydrogen peroxide
Source: Royal Society of Chemistry journal article supplement (doi:10.1039/c1cc11675d), 2011-01-01
Supplement: c1cc11675d.pdf [file c1cc11675d.pdf]

## Supporting Information

For

# First Enantioselective Iron-Porphyrin-Catalyzed Sulfide Oxidation with Aqueous Hydrogen Peroxide

Paul Le Maux and Gérard Simonneaux

Sciences Chimiques de Rennes

Ingénierie Chimique et Molécules pour le vivant

UMR 6226 CNRS, Campus de Beaulieu

35042 Rennes cedex, France

### Table of Contents

|                                                                                                                                                                                         | <u>Pages</u> |
|-----------------------------------------------------------------------------------------------------------------------------------------------------------------------------------------|--------------|
| <b>Synthesis and Characterization Details</b>                                                                                                                                           |              |
| A. General Experiments                                                                                                                                                                  | S2           |
| B. Catalytic Oxidation Procedures                                                                                                                                                       | S2           |
| <b>Figures</b>                                                                                                                                                                          |              |
| <b>Figure S1.</b> HPLC of methyl phenyl sulfoxide at 20°C                                                                                                                               | S3           |
| <b>Figure S2.</b> HPLC of methyl phenyl sulfoxide at 0°C                                                                                                                                | S3           |
| <b>Figure S3.</b> HPLC of methyl phenyl sulfoxide at -20°C                                                                                                                              | S4           |
| <b>Figure S4.</b> HPLC of methyl tolyl sulfoxide at 20°C                                                                                                                                | S4           |
| <b>Figure S5.</b> HPLC of methyl tolyl sulfoxide at 0°C                                                                                                                                 | S5           |
| <b>Figure S6.</b> HPLC of methyl tolyl sulfoxide at -20°C                                                                                                                               | S5           |
| <b>Figure S7.</b> HPLC of methyl p-methoxy phenyl sulfoxide at 20°C                                                                                                                     | S6           |
| <b>Figure S8.</b> HPLC of methyl p-methoxy phenyl sulfoxide at 0°C                                                                                                                      | S6           |
| <b>Figure S9.</b> HPLC of methyl p-methoxy phenyl sulfoxide at -20°C                                                                                                                    | S7           |
| <b>Figure S10.</b> HPLC of methyl p-nitro phenyl sulfoxide at 20°C                                                                                                                      | S7           |
| <b>Figure S11.</b> HPLC of methyl p-nitro phenyl sulfoxide at 0°C                                                                                                                       | S8           |
| <b>Figure S12.</b> HPLC of methyl p-nitro phenyl sulfoxide at -20°C                                                                                                                     | S8           |
| <b>Figure S13.</b> HPLC of methyl p-bromo phenyl sulfoxide at 20°C                                                                                                                      | S9           |
| <b>Figure S14.</b> HPLC of methyl p-bromo phenyl sulfoxide at 0°C                                                                                                                       | S9           |
| <b>Figure S15.</b> HPLC of methyl p-bromo phenyl sulfoxide at -20°C                                                                                                                     | S10          |
| <b>Figure S16.</b> HPLC of methyl o-bromo phenyl sulfoxide at 20°C                                                                                                                      | S10          |
| <b>Figure S17.</b> HPLC of methyl o-bromo phenyl sulfoxide at 0°C                                                                                                                       | S11          |
| <b>Figure S18.</b> HPLC of methyl o-bromo phenyl sulfoxide at -20°C                                                                                                                     | S11          |
| <b>Figure S19.</b> Visible spectral changes observed after addition of H <sub>2</sub> O <sub>2</sub> to a solution of <b>1</b> in MeOH at ambient temperature                           | S12          |
| <b>Figure S20.</b> Visible spectral changes observed after addition of H <sub>2</sub> O <sub>2</sub> to a solution of <b>1</b> + 2-Me Imidazole (10 eq.) in MeOH at ambient temperature | S12          |

### A. General Experiments

All reactions were performed under argon and were magnetically stirred. Solvents were distilled from appropriate drying agent prior to use: MeOH from turning Mg. Commercially available reagents were used without further purification unless otherwise stated. All reactions were monitored by TLC with Merck pre-coated aluminium foil sheets (Silica gel 60 with fluorescent indicator UV<sub>254</sub>). Compounds were visualized with UV light at 254 nm. Column chromatographies were carried out using silica gel from Merck (0.063-0.200 mm).. UV-visible spectra were recorded on a UVIKON XL from Biotech. Gas chromatography analysis were performed on a Varian CP- 3380 gas chromatography equipped with a CP-1177 injector. The enantiomeric excess of the sulfoxides was determined on a Varian Prostar 218 system equipped with Chiralcel columns. The optical rotations were determined on a Perkin Elmer 341 polarimeter.

The porphyrins were synthesised by literature methods. The corresponding iron porphyrins were prepared as previously reported.<sup>28</sup>

### Catalytic Oxidation Procedures

Fer porphyrin complex **1** (1.8mg, 1  $\mu$ mol) was placed in a test tube under argon. Then, 1 ml of distilled methanol was added, followed by sulfide (100  $\mu$ mol) and 35 % H<sub>2</sub>O<sub>2</sub> (11.6 mg, 120  $\mu$ mol) in one portion. After 1 hour, the mixture was analysed by GC for yield. Then, the reaction was quenched by addition of water and the sulfoxides were extracted with CH<sub>2</sub>Cl<sub>2</sub>. The ees of the sulfoxides were determined by chiral HPLC.

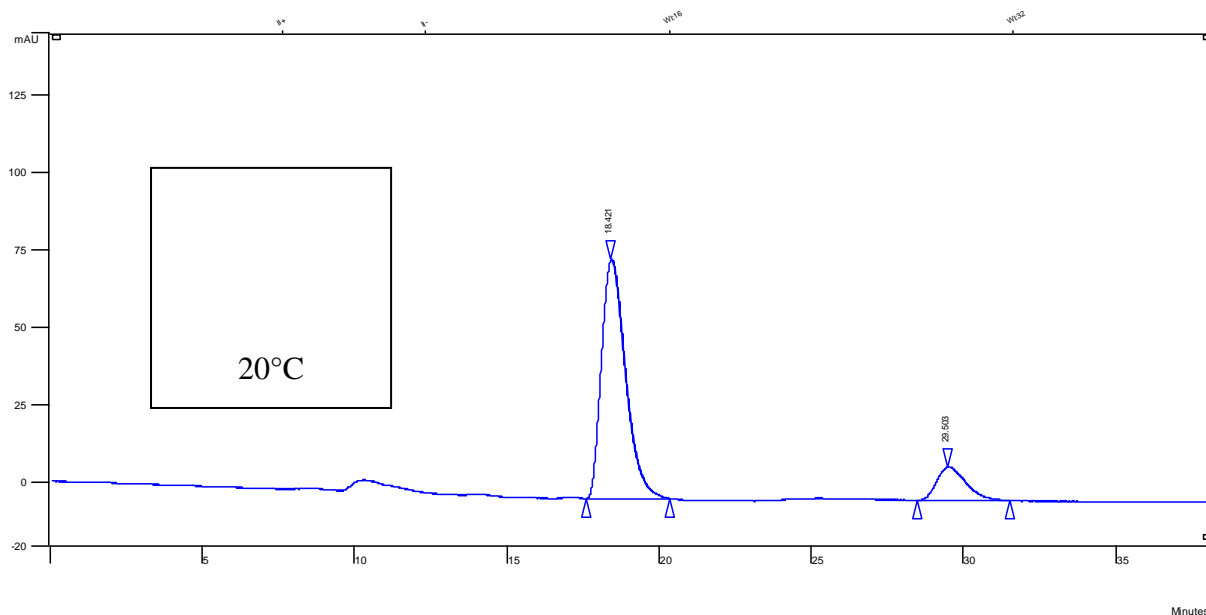

**Figure S1:** HPLC of methyl phenyl sulfoxide with a chiralcel OB-H column: n-hexane/isopropanol = 70/30, flow rate = 0.5ml/mn, wavelength = 220 nm.

| Peak | Ret. Time (min) | % Area  | EE (%) |
|------|-----------------|---------|--------|
| 1    | 18.421          | 85.4720 |        |
| 2    | 29.503          | 14.5280 | 70.944 |

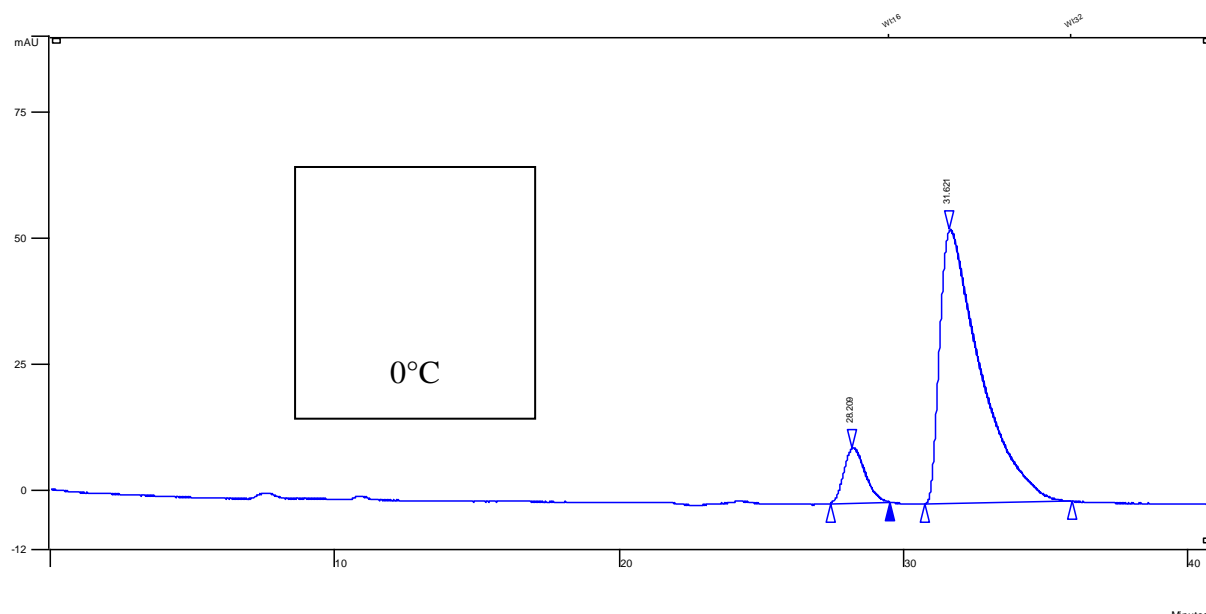

**Figure S2:** HPLC of methyl phenyl sulfoxide with a chiralcel OD-H column: n-hexane/isopropanol = 90/10, flow rate = 0.5ml/mn, wavelength = 220 nm.

| Peak | Ret. Time (min) | % Area  | EE (%)  |
|------|-----------------|---------|---------|
| 1    | 28.209          | 9.5111  |         |
| 2    | 31.621          | 90.4889 | 80.9778 |

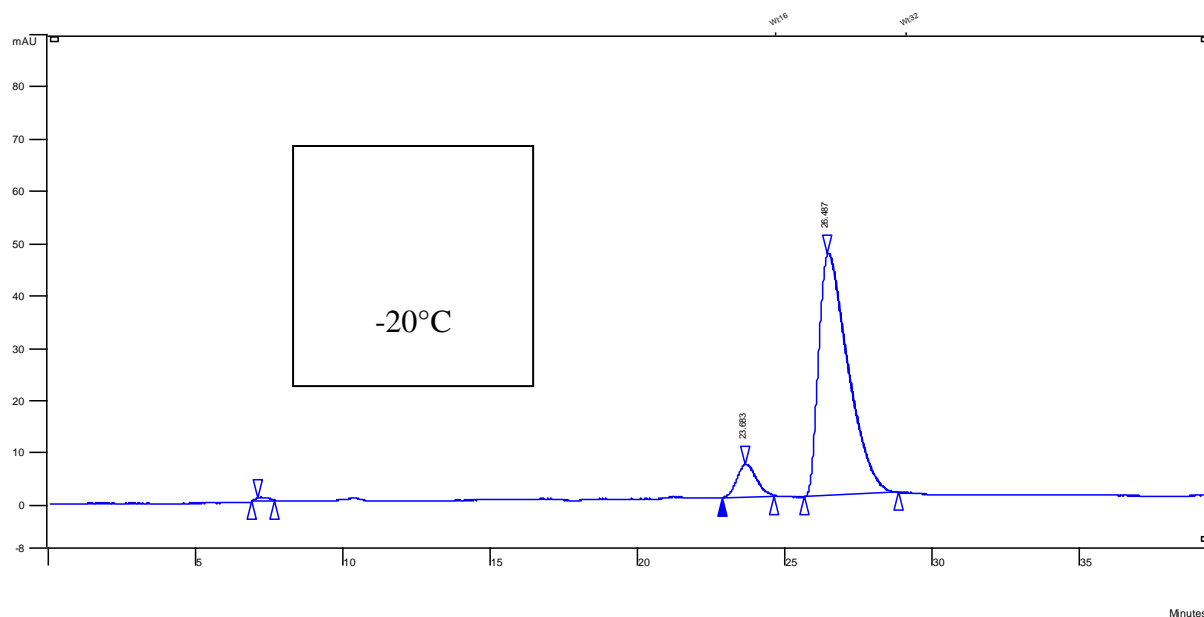

**Figure S3:** HPLC of methyl phenyl sulfoxide with a chiralcel OD-H column: n-hexane/isopropanol = 90/10, flow rate = 0.5ml/mn, wavelength = 220 nm.

| Peak | Ret. Time (min) | % Area  | EE (%)  |
|------|-----------------|---------|---------|
| 1    | 23.683          | 8.0443  |         |
| 2    | 26.487          | 91.9557 | 83.9114 |

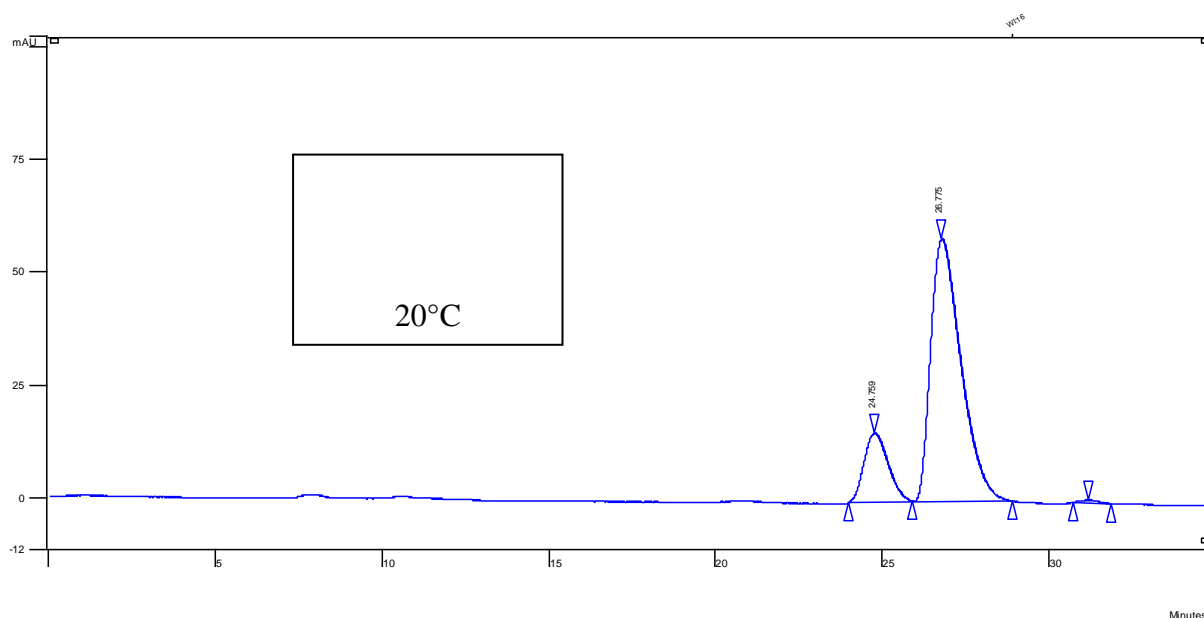

**Figure S4:** HPLC of methyl tolyl sulfoxide with a chiralcel OD-H column: n-hexane/isopropanol = 90/10, flow rate = 0.5ml/mn, wavelength = 220 nm.

| Peak | Ret. Time (min) | % Area  | EE (%) |
|------|-----------------|---------|--------|
| 1    | 24.759          | 17.5130 |        |
| 2    | 26.775          | 82.4870 | 64.974 |

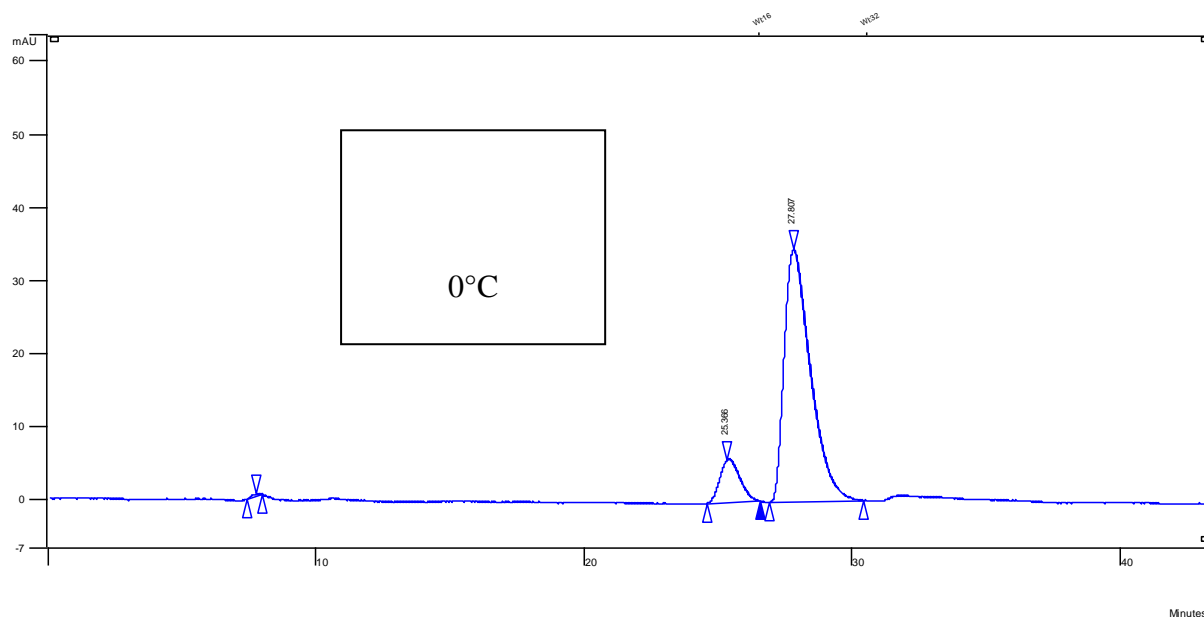

**Figure S5:** HPLC of methyl tolyl sulfoxide with a chiralcel OD-H column: n-hexane/isopropanol = 90/10, flow rate = 0.5ml/mn, wavelength = 220 nm.

| Peak | Ret. Time (min) | % Area  | EE (%)  |
|------|-----------------|---------|---------|
| 1    | 25.366          | 11.6868 |         |
| 2    | 27.807          | 88.3132 | 76.6264 |

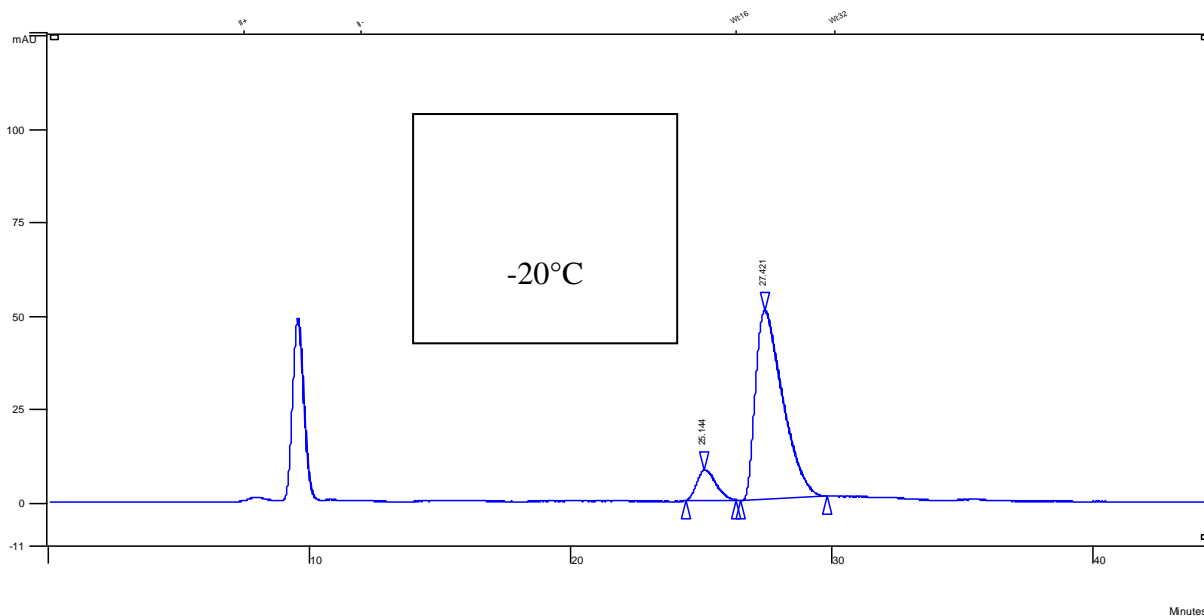

**Figure S6:** HPLC of methyl tolyl sulfoxide with a chiralcel OD-H column: n-hexane/isopropanol = 90/10, flow rate = 0.5ml/mn, wavelength = 220 nm.

| Peak | Ret. Time (min) | % Area  | EE (%)  |
|------|-----------------|---------|---------|
| 1    | 25.137          | 10.5337 |         |
| 2    | 27.421          | 89.4662 | 78.9325 |

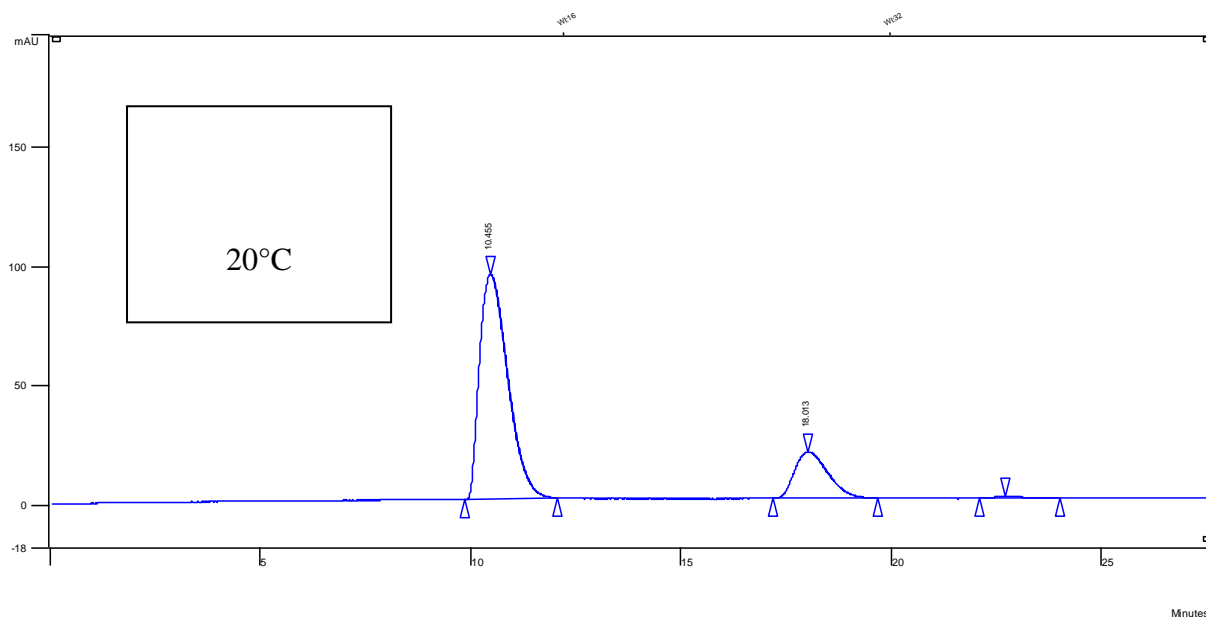

**Figure S7:** HPLC of methyl p-methoxy phenyl sulfoxide with a chiralcel OB-H column: n-hexane/isopropanol = 50/50, flow rate = 0.5ml/mn, wavelength = 220 nm.

| Peak | Ret. Time (min) | % Area  | EE (%)  |
|------|-----------------|---------|---------|
| 1    | 10.455          | 80.3742 |         |
| 2    | 18.013          | 19.6258 | 67.7484 |

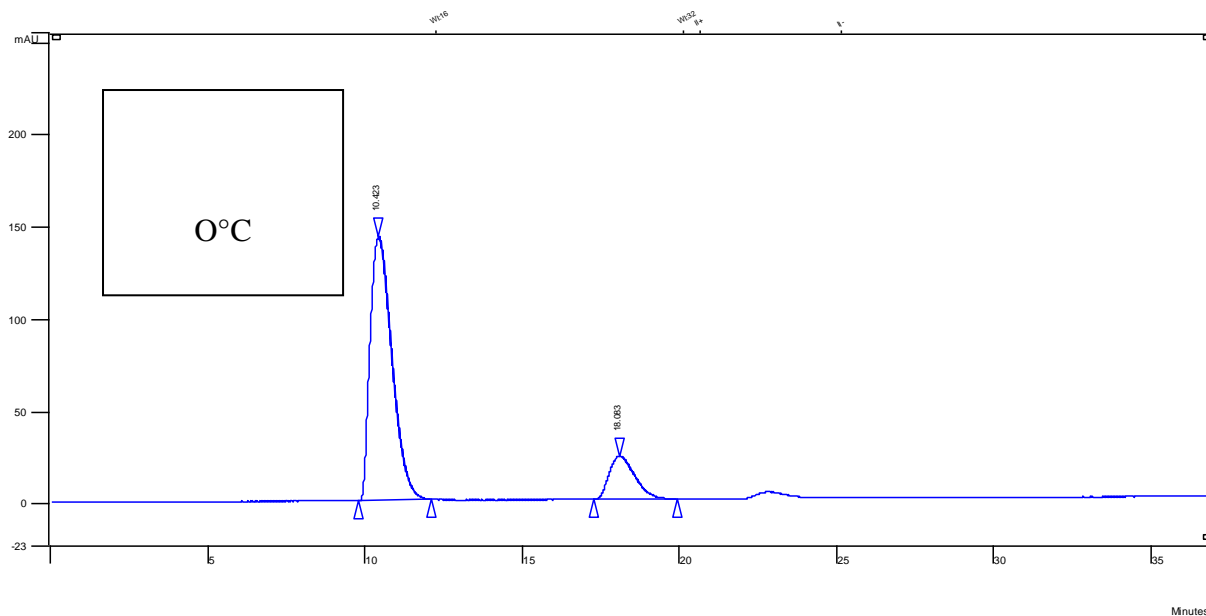

**Figure S8:** HPLC of methyl p-methoxy phenyl sulfoxide with a chiralcel OB-H column: n-hexane/isopropanol = 50/50, flow rate = 0.5ml/mn, wavelength = 220 nm.

| Peak | Ret. Time (min) | % Area  | EE (%)  |
|------|-----------------|---------|---------|
| 1    | 10.423          | 83.9410 |         |
| 2    | 18.083          | 16.0589 | 67.8821 |

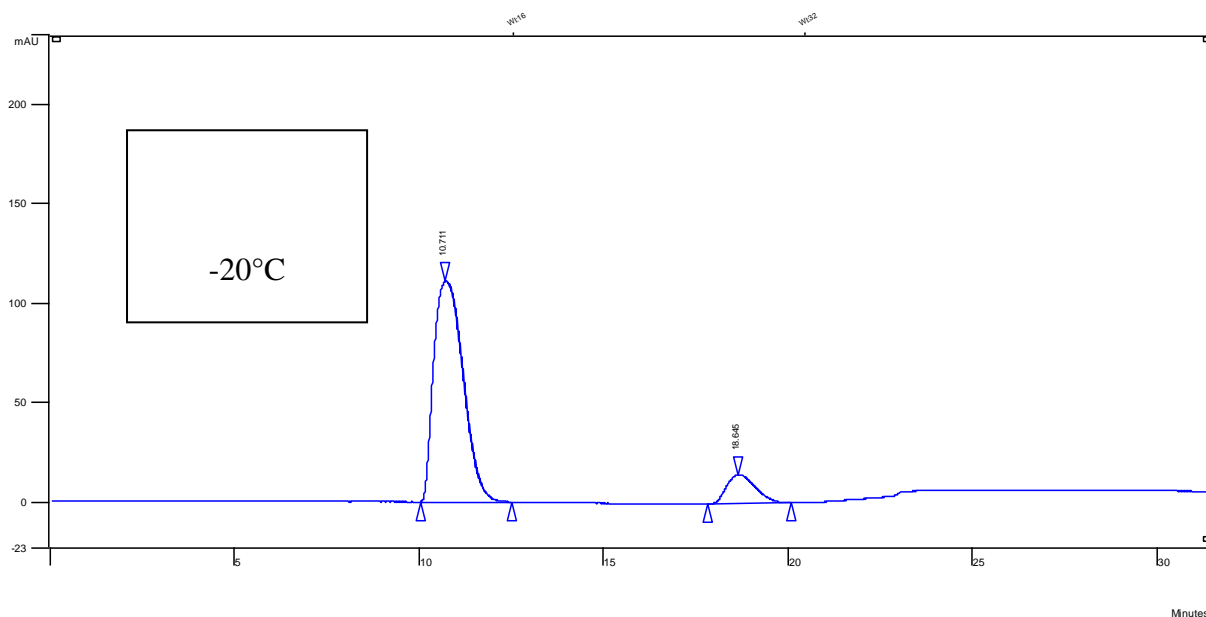

**Figure S9:** HPLC of methyl p-methoxy phenyl sulfoxide with a chiralcel OB-H column: n-hexane/isopropanol = 50/50, flow rate = 0.5ml/mn, wavelength = 220 nm.

| Peak | Ret. Time (min) | % Area  | EE (%)  |
|------|-----------------|---------|---------|
| 1    | 10.711          | 88.3163 |         |
| 2    | 18.645          | 11.6837 | 76.6326 |

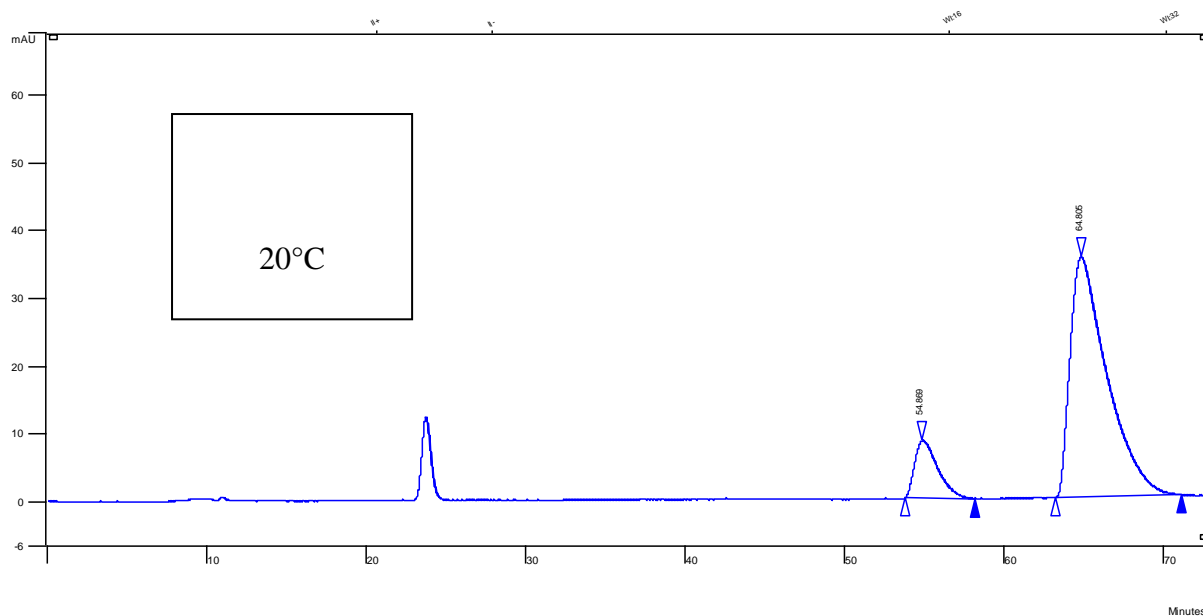

**Figure S10:** HPLC of methyl p-nitro phenyl sulfoxide with a chiralcel OJ-H column: n-hexane/isopropanol = 80/20, flow rate = 0.5ml/mn, wavelength = 220 nm.

| Peak | Ret. Time (min) | % Area  | EE (%)  |
|------|-----------------|---------|---------|
| 1    | 54.885          | 12.8524 |         |
| 2    | 64.813          | 87.1475 | 74.2951 |

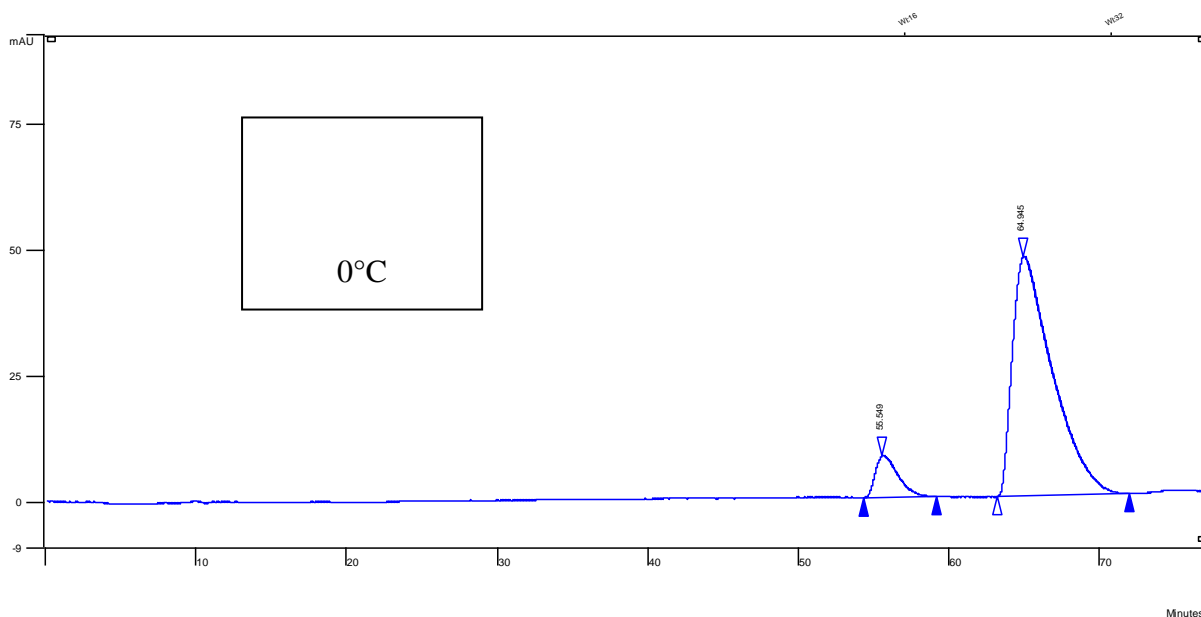

**Figure S11:** HPLC of methyl p-nitro phenyl sulfoxide with a chiralcel OJ-H column: n-hexane/isopropanol = 80/20, flow rate = 0.5ml/mn, wavelength = 220 nm.

| Peak | Ret. Time (min) | % Area  | EE (%)  |
|------|-----------------|---------|---------|
| 1    | 55.549          | 8.8198  |         |
| 2    | 64.945          | 91.1802 | 82.3604 |

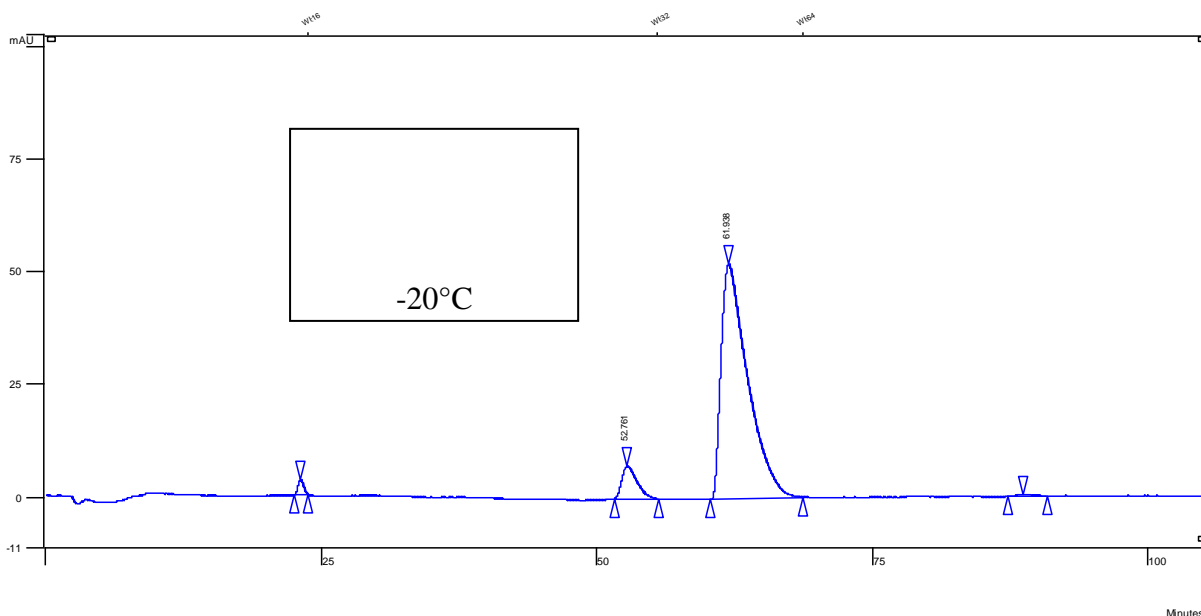

**Figure S12:** HPLC of methyl p-nitro phenyl sulfoxide with a chiralcel OJ-H column: n-hexane/isopropanol = 80/20, flow rate = 0.5ml/mn, wavelength = 220 nm.

| Peak | Ret. Time (min) | % Area  | EE (%)  |
|------|-----------------|---------|---------|
| 1    | 52.761          | 7.3998  |         |
| 2    | 61.938          | 92.6002 | 85.2004 |



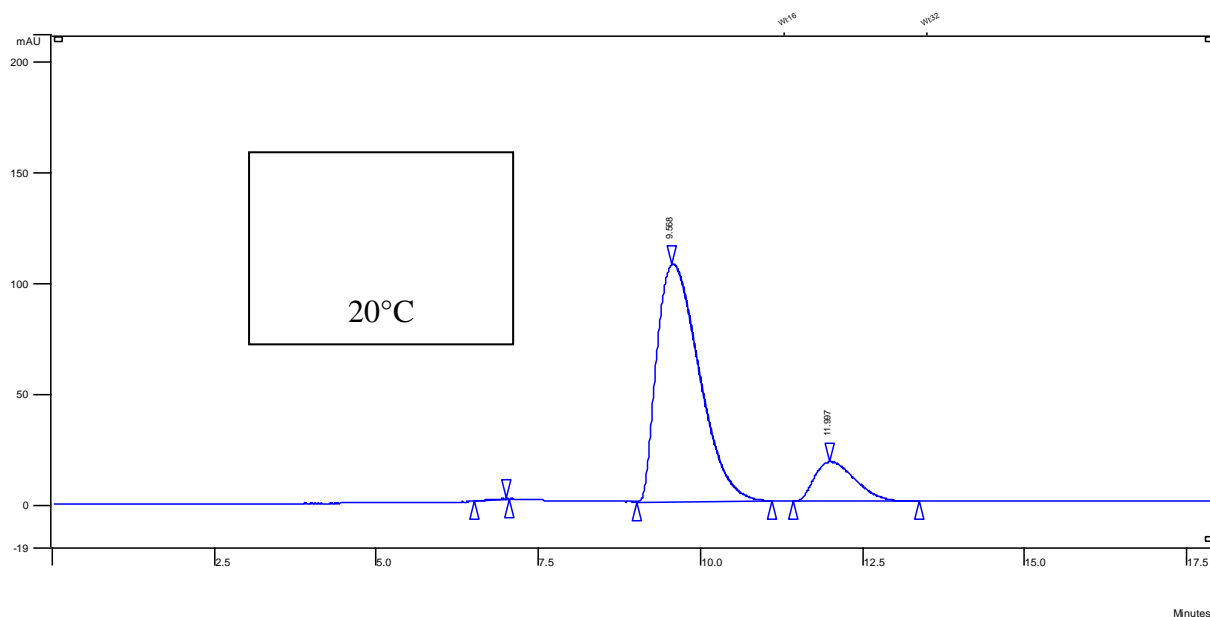

**Figure S13:** HPLC of methyl p-bromo phenyl sulfoxide with a chiralcel OB-H column: n-hexane/isopropanol = 50/50, flow rate = 0.5ml/mn, wavelength = 220 nm.

| Peak | Ret. Time (min) | % Area  | EE (%)  |
|------|-----------------|---------|---------|
| 1    | 9.568           | 86.1846 |         |
| 2    | 11.997          | 13.8153 | 72.3693 |

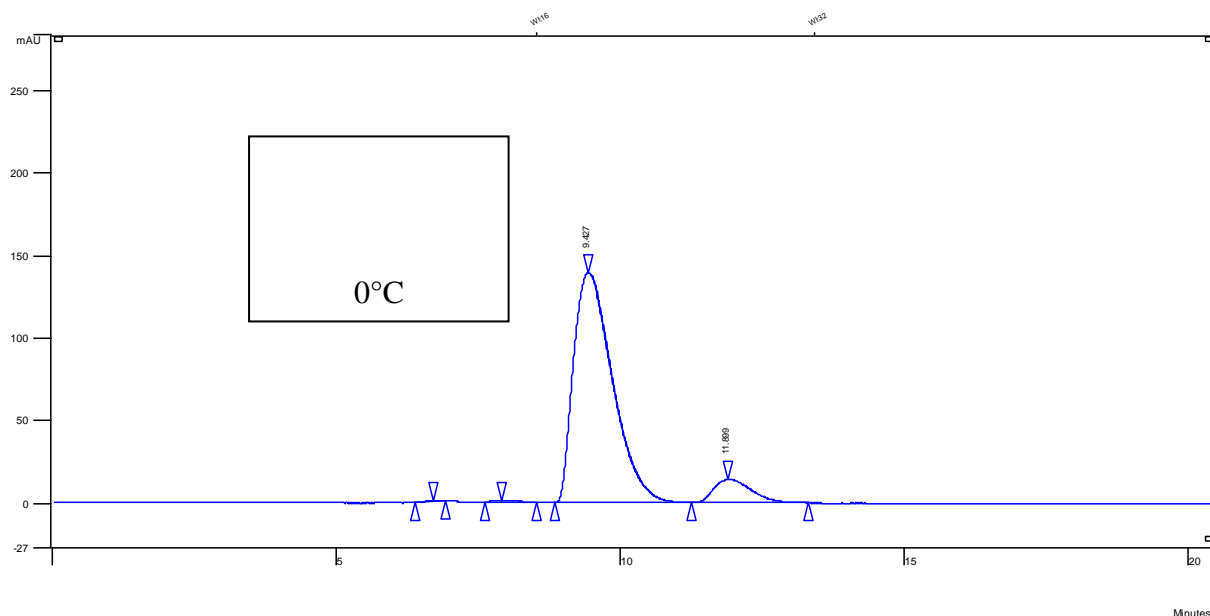

**Figure S14:** HPLC of methyl p-bromo phenyl sulfoxide with a chiralcel OB-H column: n-hexane/isopropanol = 50/50, flow rate = 0.5ml/mn, wavelength = 220 nm.

| Peak | Ret. Time (min) | % Area  | EE (%)  |
|------|-----------------|---------|---------|
| 1    | 9.427           | 91.0857 |         |
| 2    | 11.899          | 8.9143  | 82.1714 |

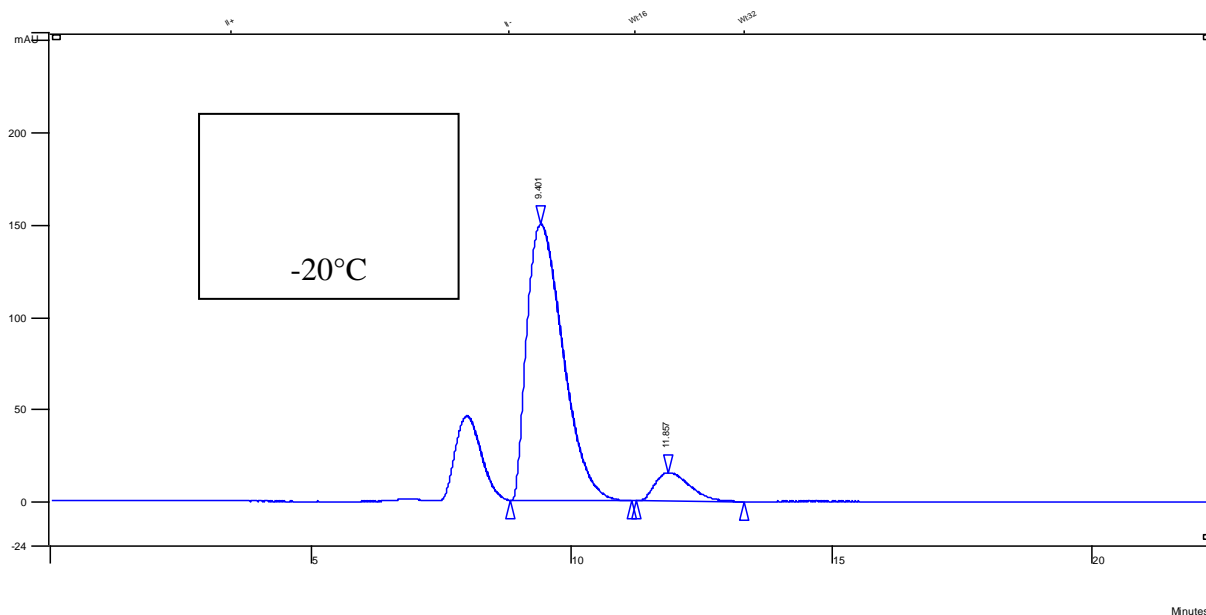

**Figure S15:** HPLC of methyl p-bromo phenyl sulfoxide with a chiralcel OB-H column: n-hexane/isopropanol = 50/50, flow rate = 0.5ml/mn, wavelength = 220 nm.

| Peak | Ret. Time (min) | % Area  | EE (%)  |
|------|-----------------|---------|---------|
| 1    | 9.401           | 91.0708 |         |
| 2    | 11.857          | 8.9291  | 82.1417 |

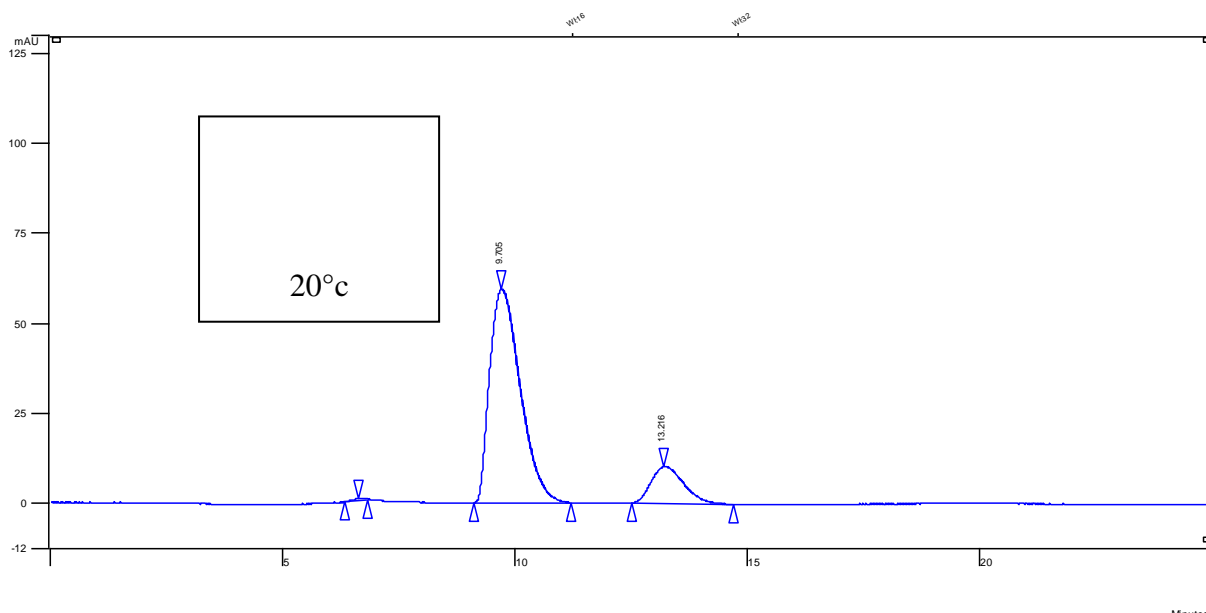

**Figure S16:** HPLC of methyl o-bromo phenyl sulfoxide with a chiralcel OB-H column: n-hexane/isopropanol = 50/50, flow rate = 0.5ml/mn, wavelength = 220 nm.

| Peak | Ret. Time (min) | % Area  | EE (%)  |
|------|-----------------|---------|---------|
| 1    | 9.705           | 84.5615 |         |
| 2    | 13.216          | 15.4385 | 69.1230 |

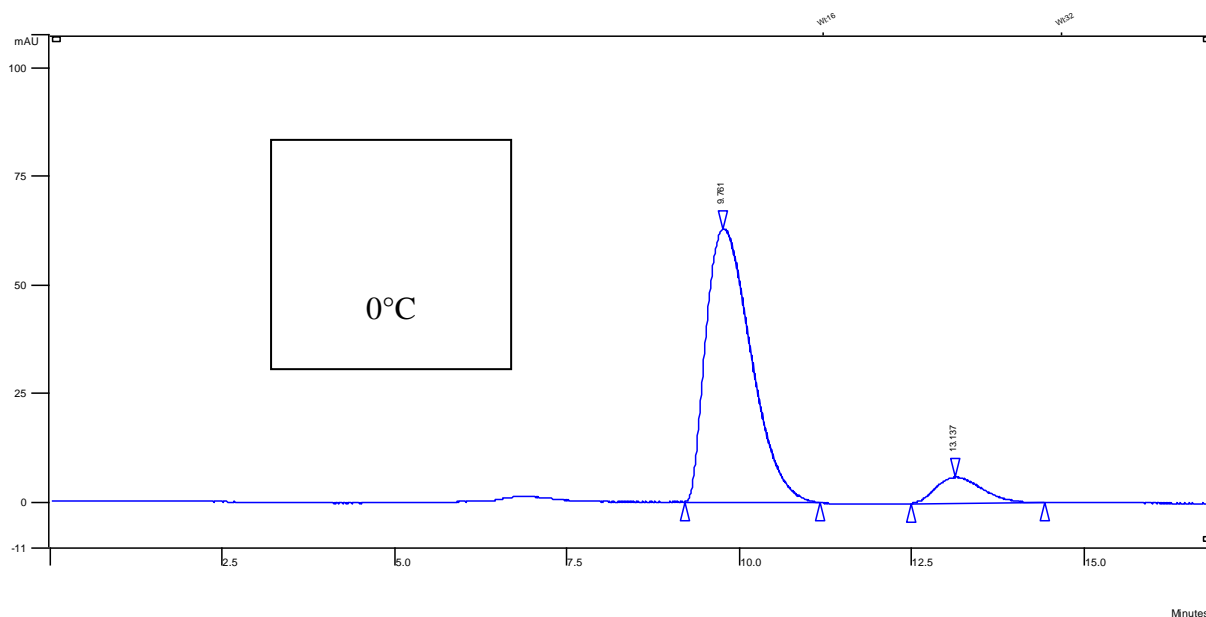

**Figure S17:** HPLC of methyl o-bromo phenyl sulfoxide with a chiralcel OB-H column: n-hexane/isopropanol = 50/50, flow rate = 0.5ml/mn, wavelength = 220 nm.

| Peak | Ret. Time (min) | % Area  | EE (%)  |
|------|-----------------|---------|---------|
| 1    | 9.761           | 90.9667 |         |
| 2    | 13.137          | 9.0333  | 81.9334 |

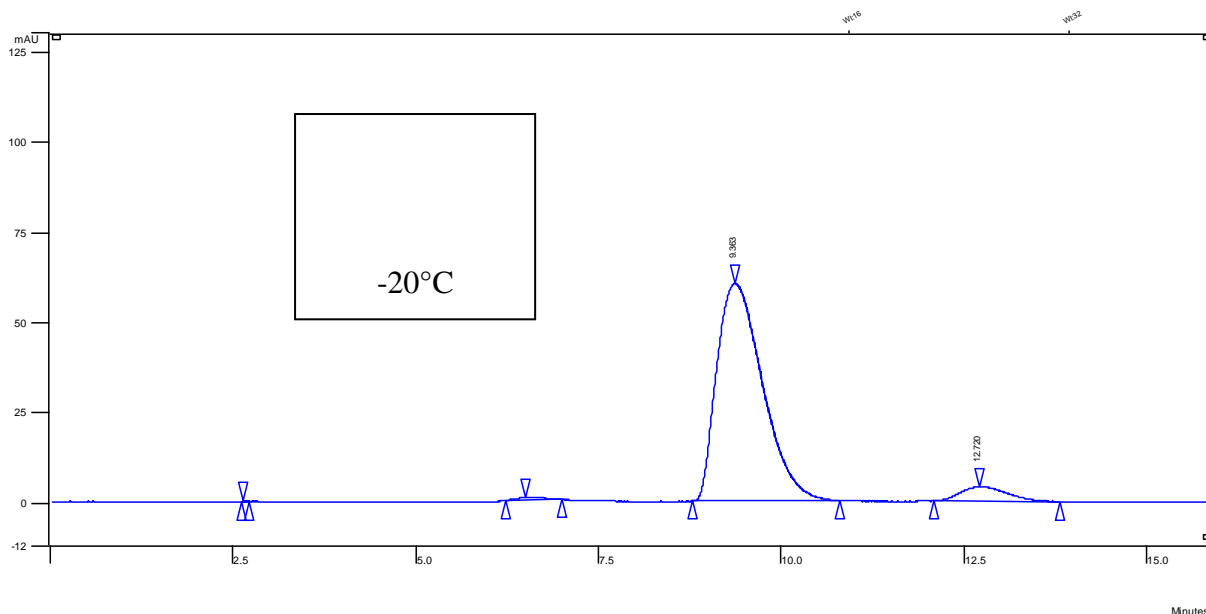

**Figure S18:** HPLC of methyl o-bromo phenyl sulfoxide with a chiralcel OB-H column: n-hexane/isopropanol = 50/50, flow rate = 0.5ml/mn, wavelength = 220 nm.

| Peak | Ret. Time (min) | % Area  | EE (%)  |
|------|-----------------|---------|---------|
| 1    | 9.363           | 93.6558 |         |
| 2    | 12.720          | 6.3442  | 87.3116 |

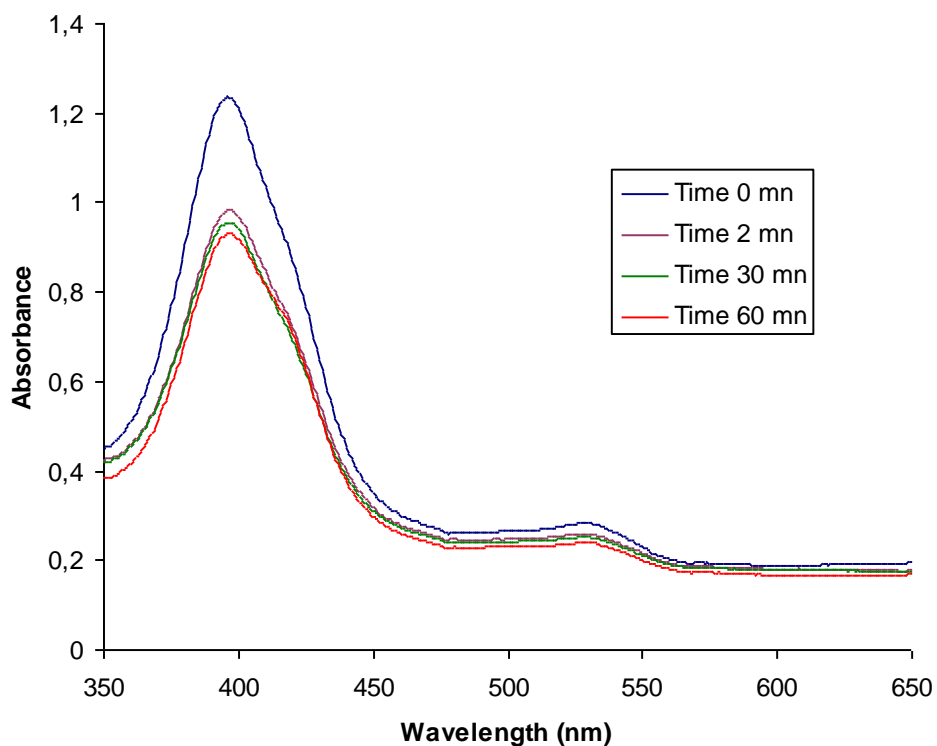

**Figure S19.** Visible spectral changes observed after addition of H<sub>2</sub>O<sub>2</sub> to a solution of **1** in MeOH at ambient temperature

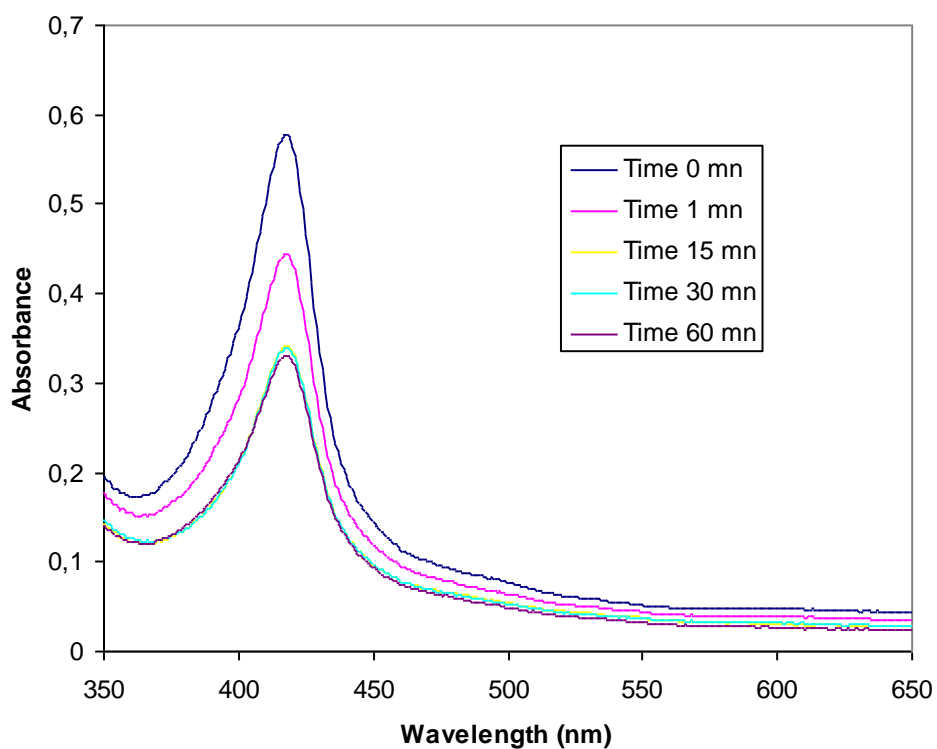

**Figure S20.** Visible spectral changes observed after addition of H<sub>2</sub>O<sub>2</sub> to a solution of **1** + 2-Me Imidazole (10 eq.) in MeOH at ambient temperature
